# Supplementary material
Source: PubMed Central journal article supplement (PMC2749945)
Supplement: NIHMS139848-supplement-01.pdf [file NIHMS139848-supplement-01.pdf]

Type of file: table

Label: 1

Filename: Supplement\_Table\_3B.doc

**Table 3B. Association of Plasma ADMA and brain MRI variables**

| <b>Model **</b>        |                  |      |                         |             |
|------------------------|------------------|------|-------------------------|-------------|
| 1 SD ↑                 | 1.01 [0.88-1.16] | 0.87 | <b>1.18 [1.03-1.36]</b> | <b>0.02</b> |
| Q1                     |                  | Ref  |                         | Ref         |
| Q2                     | 1.02 [0.69-1.50] | 0.92 | <b>1.60 [1.04-2.45]</b> | <b>0.03</b> |
| Q3                     | 1.17 [0.80-1.69] | 0.42 | 1.40 [0.91-2.15]        | 0.13        |
| Q4                     | 0.99 [0.67-1.45] | 0.96 | 1.58 [1.03-2.42]        | <b>0.04</b> |
| Trend across quartiles |                  | 0.87 |                         | 0.08        |
| Q234 vs. Q1            | 1.06 [0.78-1.44] | 0.73 | <b>1.52 [1.06-2.19]</b> | <b>0.02</b> |
| <b>Model ***</b>       |                  |      |                         |             |
| 1 SD ↑                 | 1.00 [0.87-1.14] | 0.96 | <b>1.15 [1.00-1.32]</b> | <b>0.05</b> |
| Q1                     |                  | Ref  |                         | Ref         |
| Q2                     | 0.98 [0.67-1.43] | 0.90 | <b>1.54 [1.02-2.33]</b> | <b>0.04</b> |
| Q3                     | 1.12 [0.78-1.62] | 0.54 | 1.33 [0.87-2.03]        | 0.19        |
| Q4                     | 0.95 [0.65-1.39] | 0.79 | 1.47 [0.97-2.23]        | 0.07        |
| Trend across quartiles |                  | 0.98 |                         | 0.15        |
| Q234 vs. Q1            | 1.02 [0.75-1.38] | 0.93 | <b>1.44 [1.01-2.05]</b> | <b>0.04</b> |

\*\* Model 4 (Model 1, excluding prevalent TIAs)

\*\*\* Model 5 (Model 1, plus use of statins or anticoagulant therapy)

Type of file: table

Label: 2

Filename: Supplemental\_Table\_\_4\_SDMA.doc

**Table 4. Association of Plasma SDMA and brain MRI variables**

|                                    | <b>Large WMH</b>    |      | <b>Silent Brain Infarct</b> |      |
|------------------------------------|---------------------|------|-----------------------------|------|
| Model                              | Odds Ratio (95% CI) | p    | Odds Ratio (95% CI)         | p    |
| <b><u>Model 1</u><sup>§</sup></b>  |                     |      |                             |      |
| 1 SD ↑                             | 0.90 [0.78-1.04]    | 0.15 | 1.11 [0.97-1.27]            | 0.14 |
| Q1                                 |                     | Ref  |                             | Ref  |
| Q2                                 | 0.84 [0.58-1.21]    | 0.35 | 1.12 [0.74-1.72]            | 0.59 |
| Q3                                 | 0.83 [0.58-1.19]    | 0.31 | 1.19 [0.79-1.80]            | 0.40 |
| Q4                                 | 0.71 [0.48-1.04]    | 0.08 | 1.34 [0.89-2.02]            | 0.16 |
| Trend across quartiles             |                     | 0.09 |                             | 0.15 |
| Q234 vs. Q1                        | 0.79 [0.59-1.07]    | 0.13 | 1.22 [0.86-1.73]            | 0.27 |
| <b><u>Model 2</u><sup>  </sup></b> |                     |      |                             |      |
| 1 SD ↑                             | 0.89 [0.78-1.03]    | 0.12 | 1.13 [0.98-1.29]            | 0.09 |
| Q1                                 |                     | Ref  |                             | Ref  |
| Q2                                 | 0.84 [0.58-1.22]    | 0.36 | 1.18 [0.77-1.81]            | 0.46 |
| Q3                                 | 0.81 [0.56-1.18]    | 0.27 | 1.29 [0.84-1.96]            | 0.24 |
| Q4                                 | 0.70 [0.47-1.03]    | 0.07 | 1.46 [0.96-2.23]            | 0.08 |
| Trend across quartiles             |                     | 0.07 |                             | 0.07 |
| Q234 vs. Q1                        | 0.79 [0.58-1.06]    | 0.12 | 1.30 [0.91-1.86]            | 0.15 |
| <b><u>Model 3</u><sup>#</sup></b>  |                     |      |                             |      |
| 1 SD ↑                             | 0.91 [0.79-1.05]    | 0.20 | 1.08 [0.94-1.24]            | 0.30 |
| Q1                                 |                     | Ref  |                             | Ref  |
| Q2                                 | 0.85 [0.59-1.24]    | 0.40 | 1.13 [0.73-1.74]            | 0.59 |
| Q3                                 | 0.83 [0.57-1.20]    | 0.32 | 1.22 [0.80-1.86]            | 0.36 |
| Q4                                 | 0.73 [0.49-1.08]    | 0.11 | 1.32 [0.86-2.02]            | 0.21 |
| Trend across quartiles             |                     | 0.12 |                             | 0.19 |
| Q234 vs. Q1                        | 0.81 [0.59-1.10]    | 0.17 | 1.22 [0.85-1.74]            | 0.28 |

§Model 1 (adjusted for age and sex)

|| Model 2 (adjusted for atrial fibrillation, history of cardiovascular disease, smoking, diabetes mellitus, systolic blood pressure, anti-hypertension therapy, and time to MRI)

# Model 3 (additionally adjusted for log of total homocystein level)
